# Supplementary material for: Cohort Profile: Community-based prospective cohort from the National Cancer Center, Korea
Source: PubMed Central journal article supplement — Int J Epidemiol. 2015 Dec 20;46(2):e14. doi: 10.1093/ije/dyv302 (PMC5837379; doi:10.1093/ije/dyv302), 2015-12-20
Supplement: dyv302_supp.pdf [file dyv302_supp.pdf]

Appendix 1. Number of study participants, study area and year of baseline study of the KNCC Community Cohort

| Year of baseline study | Area      | Number of participants |
|------------------------|-----------|------------------------|
| 1993                   | Haman     | 1224                   |
| 1995                   | Haman     | 939                    |
| 1996                   | Haman     | 402                    |
| 1997                   | Haman     | 1105                   |
| 1998                   | Haman     | 689                    |
| 1999                   | Haman     | 572                    |
| 2000                   | Haman     | 543                    |
| 2001                   | Haman     | 984                    |
| 2002                   | Haman     | 280                    |
| 2003                   | Chuncheon | 972                    |
|                        | Chungju   | 225                    |
|                        | Haman     | 548                    |
| 2004                   | Sancheong | 517                    |
|                        | Changwon  | 464                    |
|                        | Chuncheon | 611                    |
|                        | Chungju   | 874                    |
| 2005                   | Sancheong | 573                    |
|                        | Changwon  | 462                    |
| 2006                   | Sancheong | 965                    |
|                        | Changwon  | 421                    |
| 2007                   | Sancheong | 609                    |
|                        | Changwon  | 356                    |
| 2008                   | Sancheong | 792                    |
| 2009                   | Sancheong | 592                    |
| 2010                   | Sancheong | 585                    |
| Total                  |           | 16 304                 |

Appendix 2. Biospecimens of the KNCC Community Cohort stored at two biorepositories

| Specimen   | National Cancer Center, Goyang |                   | Seoul National University, Yang Pyeong |                   | Volume per aliquot (mL) | Temperature (°C)      |
|------------|--------------------------------|-------------------|----------------------------------------|-------------------|-------------------------|-----------------------|
|            | Number of participant          | Number of aliquot | Number of participant                  | Number of aliquot |                         |                       |
| Serum      | 13 184                         | 27 381            | 4124                                   | 4124              | ≤2                      | -70/-140 <sup>a</sup> |
| Plasma     | 16 045                         | 43 506            | 7009                                   | 7009              | ≤2                      | -70/-140 <sup>a</sup> |
| Buffy coat | 11 095                         | 23 471            | 5656                                   | 5656              | ≤0.5                    | -70/-140 <sup>a</sup> |
| Packed RBC | 16 307                         | 27 688            | 5948                                   | 5948              | ≤2                      | -70/-140 <sup>a</sup> |
| Urine      | 11 890                         | 11 888            | -                                      | -                 | ≤2                      | -20                   |

<sup>a</sup>The blood samples collected between 1993 and 2008 are stored at a temperature of -70°C, and the samples collected between 2009 and 2010 are stored at -140°C.

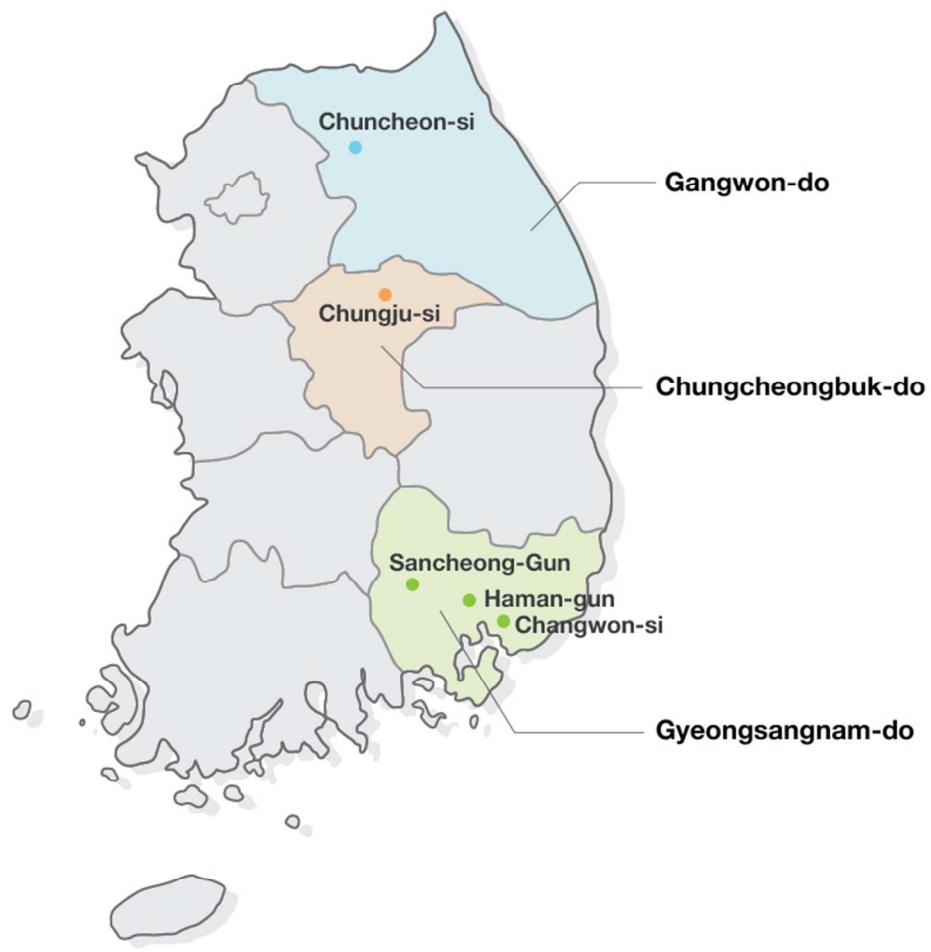

300x297mm (72 x 72 DPI)
